# Supplementary material for: Bivalent recognition of fatty acyl-CoA by a human integral membrane palmitoyltransferase
Source: PubMed Central journal article supplement — Proc Natl Acad Sci U S A. 2022 Feb 9;119(7):e2022050119. doi: 10.1073/pnas.2022050119 (PMC8851515; doi:10.1073/pnas.2022050119), 2022-02-09
Supplement: pnas.2022050119.sapp.pdf [file pnas.2022050119.sapp.pdf]

**SUPPLEMENTARY FIGURES**

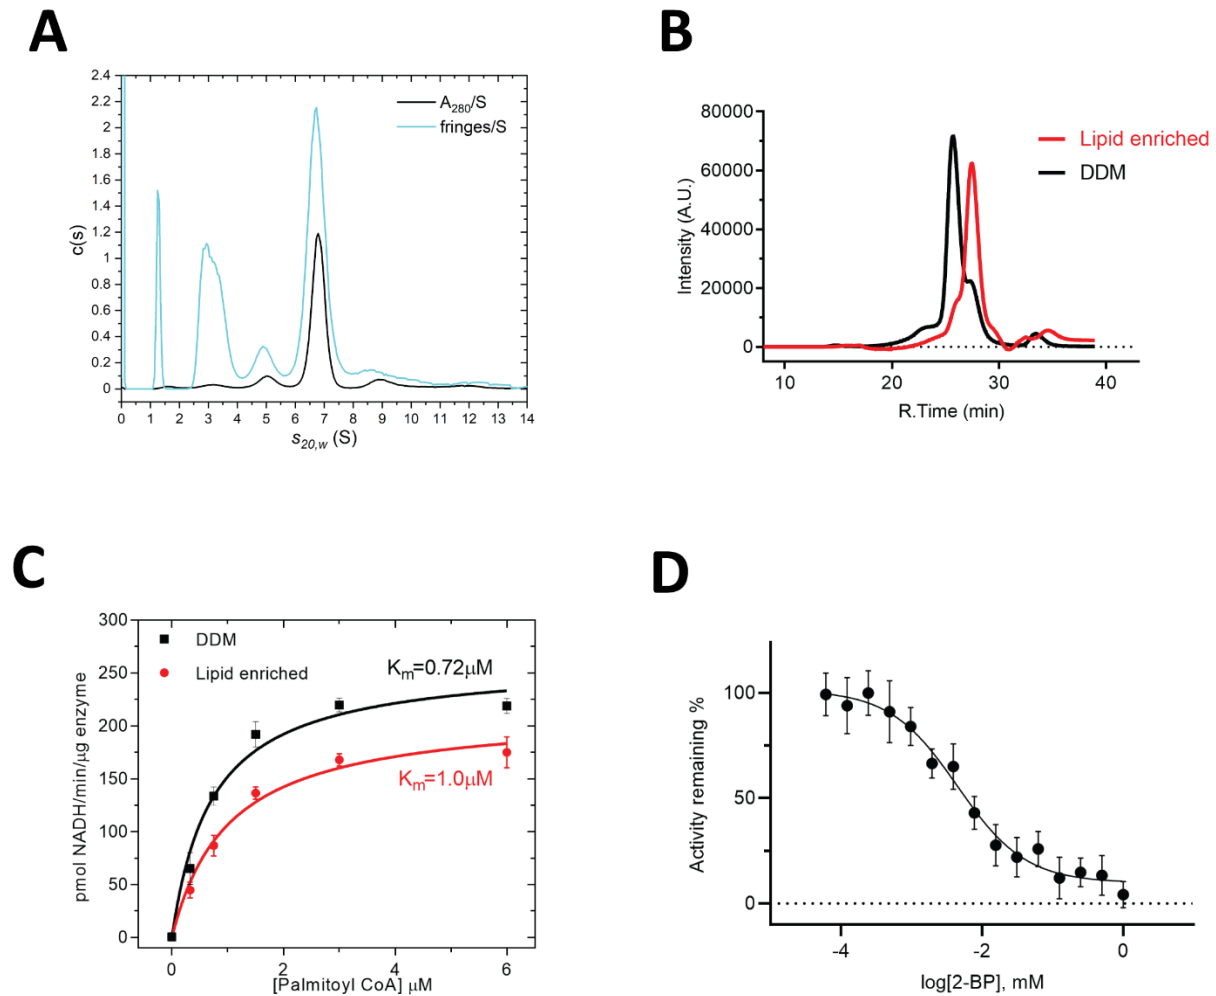

**Figure S1. Monomeric state of DHHC20 in a lipid-rich environment. (A)** Sedimentation velocity experiments of the detergent solubilized DHHC20. The absorbance and interference  $c(s)$  distributions were analyzed in GUSSE. The integration of the major species results in a species at  $6.77 \pm 0.02$  S with a molar mass of  $170 \pm 30$  kDa, of which  $80 \pm 13$  kDa represents the protein. **(B)** FSEC profiles for mVneus-DHHC fusion protein purified in DDM or lipid-rich conditions. **(C)** Determination of kinetic parameters for the autopalmitylation of hDHHC20 using the coupled-enzyme assay. Shown is a Michaelis-Menten fit to palmitoyl CoA titration with hDHHC20 purified in DDM (black square) or lipid-rich conditions (red circle), with  $K_m=0.72 \pm 0.1 \mu\text{M}$  ( $k_{\text{cat}}=17.4 \pm 1 \text{ min}^{-1}$ ) and  $K_m=1.0 \pm 1 \mu\text{M}$  ( $k_{\text{cat}}=14.3 \pm 0.8 \text{ min}^{-1}$ ), respectively. **(D)**  $\text{IC}_{50}$  curve for the inhibition of hDHHC20 purified in lipid-rich conditions by 2-bromopalmitate (2-BP).  $\text{IC}_{50}$  value ( $4.5 \mu\text{M}$ ) were determined by fitting a three-parameter dose-response curve (GraphPad Prism);  $n = 3$ ; error bars, S.D.

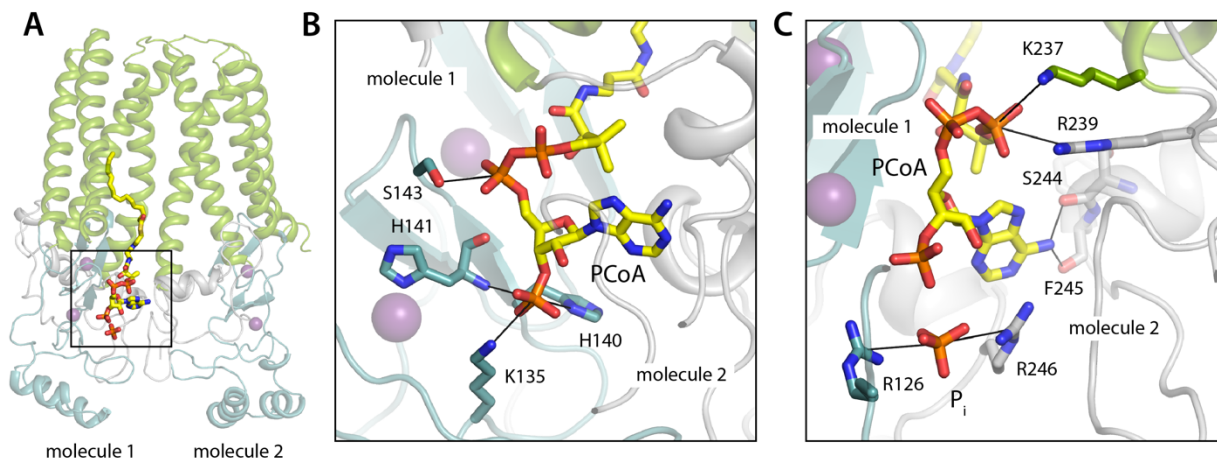

**Figure S2. Unit cell of the hDHHS20-PCoA crystal.** (A) The unit cell contains two hDHHC molecules (cartoons); a complete palmitoyl-CoA (sticks) can be discerned bound to molecule 1. (B) Polar contacts between the headgroup of palmitoyl-CoA and molecule 1. (C) Polar contacts between the headgroup of palmitoyl-CoA and molecule 2. A phosphate ion ( $P_i$ ) from the buffer binds in close proximity to the terminal phosphate group of PCoA, and is coordinate by residues in molecule 1.

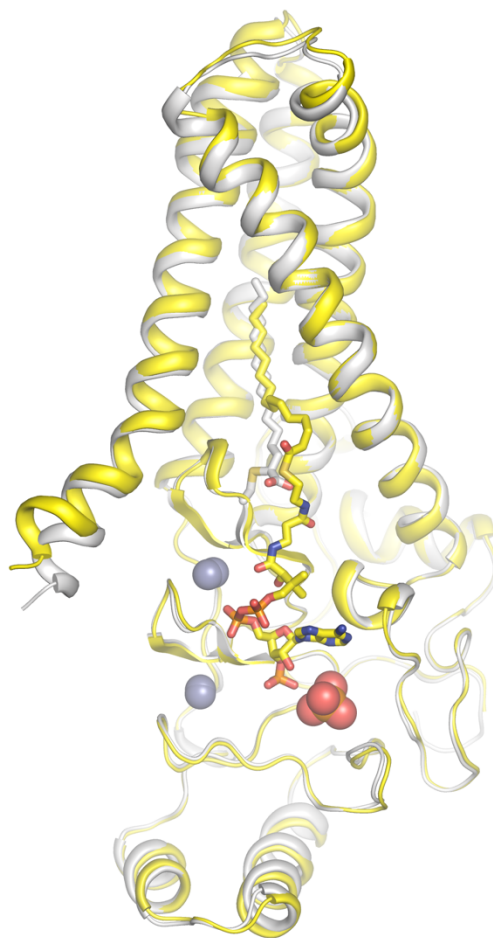

**Figure S3.** Superposition of the 2-BP complex of hDHHC20 (9) with the crystal structure of hDHHS20-PCoA complex. The 2-BP structure is shown in light grey and the hDHHS20-PCoA structure is shown in yellow. The zinc ions are shown as grey spheres.

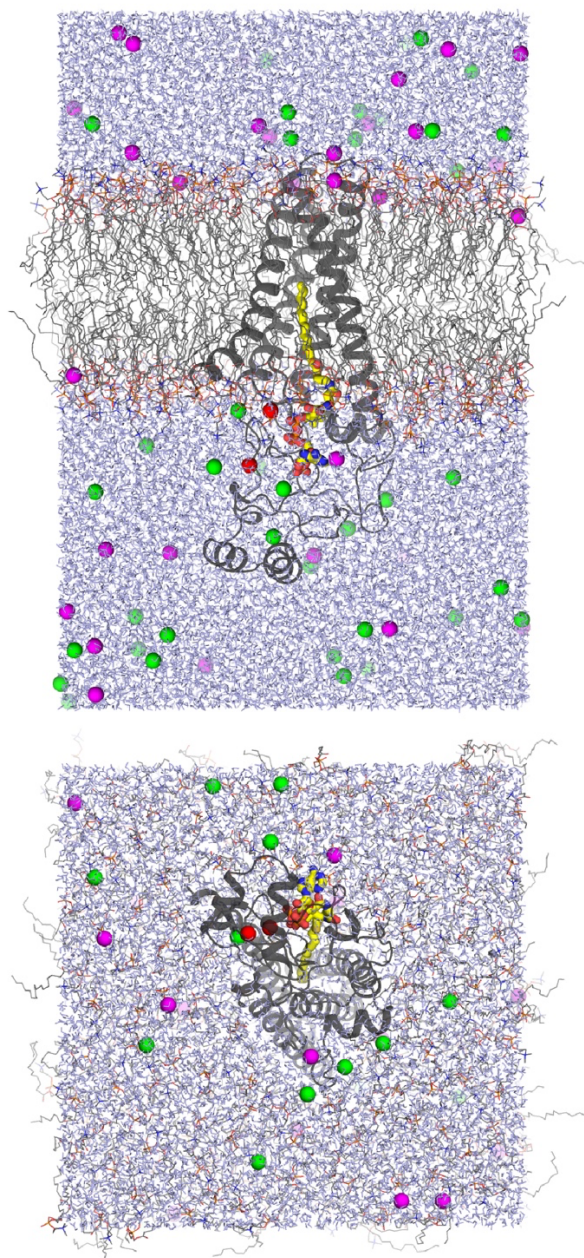

**Figure S4. Molecular dynamics simulation of hDHHC20 with bound palmitoyl-CoA.** The figure shows a snapshot of one of the molecular systems considered in the all-atom simulations reported in this study, viewed along the membrane plane (*upper panel*) and from the cytoplasmic space (*lower panel*). This system consists of wild-type hDHHC20 (*gray cartoon*) with bound Zn<sup>2+</sup> (*red spheres*); a palmitoyl-CoA molecule (*sticks*); a POPC lipid bilayer (*lines*); and a solution containing 100 mM NaCl plus counterions neutralizing the total system charge (*green/magenta/purple*). All boundaries are periodic.

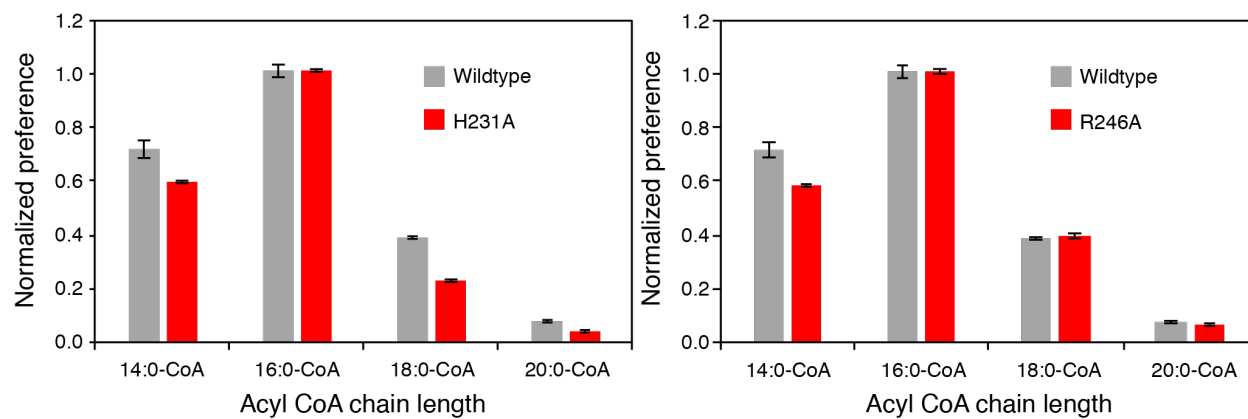

**Figure S5. Acyl-CoA chain-length selectivity of mutants of residues that contact PCoA headgroup.** As determined by the autoacylation assay. The x axis shows the carbon-chain lengths of different acyl-CoA donors, and the y axis shows normalized activity (initial velocity) of wild-type or mutant versions of hDHHC20. Each data set is individually normalized to 1 for the activity with regard to palmitoyl-CoA.

**Table S1. Data collection and refinement statistics.**

|                                       | <b>DHHS_160CoA</b>                      |
|---------------------------------------|-----------------------------------------|
| <b>Wavelength</b>                     |                                         |
| <b>Resolution range</b>               | 67.53 - 2.88 (2.983 - 2.88)             |
| <b>Space group</b>                    | P 1 21 1                                |
| <b>Unit cell</b>                      | 53.529 114.61<br>83.596 90 91.234<br>90 |
| <b>Total reflections</b>              | 160670 (16119)                          |
| <b>Unique reflections</b>             | 22872 (1798)                            |
| <b>Multiplicity</b>                   | 6.9 (7.0)                               |
| <b>Completeness (%)</b>               | 96.90 (78.10)                           |
| <b>Mean I/sigma(I)</b>                | 7.81 (0.59)                             |
| <b>Wilson B-factor</b>                | 92.26                                   |
| <b>R-merge</b>                        | 0.1685 (3.203)                          |
| <b>R-meas</b>                         | 0.1823 (3.461)                          |
| <b>R-pim</b>                          | 0.06881 (1.302)                         |
| <b>CC1/2</b>                          | 0.991 (0.503)                           |
| <b>CC*</b>                            | 0.998 (0.818)                           |
| <b>Reflections used in refinement</b> | 22196 (1797)                            |
| <b>Reflections used for R-free</b>    | 1974 (165)                              |
| <b>R-work</b>                         | 0.2783 (0.5536)                         |
| <b>R-free</b>                         | 0.3283 (0.6430)                         |
| <b>CC(work)</b>                       | 0.906 (0.748)                           |
| <b>CC(free)</b>                       | 0.881 (0.435)                           |
| <b>Number of non-hydrogen atoms</b>   | 4702                                    |

|                                  |        |
|----------------------------------|--------|
|                                  | 4583   |
| <b>macromolecules</b>            |        |
| <b>ligands</b>                   | 105    |
| <b>solvent</b>                   | 14     |
| <b>Protein residues</b>          | 586    |
| <b>RMS(bonds)</b>                | 0.003  |
| <b>RMS(angles)</b>               | 0.56   |
| <b>Ramachandran favored (%)</b>  | 97.38  |
| <b>Ramachandran allowed (%)</b>  | 2.62   |
| <b>Ramachandran outliers (%)</b> | 0.00   |
| <b>Rotamer outliers (%)</b>      | 0.45   |
| <b>Clashscore</b>                | 1.92   |
| <b>Average B-factor</b>          | 129.99 |
|                                  | 129.76 |
| <b>macromolecules</b>            |        |
| <b>ligands</b>                   | 142.11 |
| <b>solvent</b>                   | 112.28 |

Statistics for the highest-resolution shell are shown in parentheses.

**Table S1.** Data collection and refinement statistics for the crystal structure of human DHHS20 with palmitoyl CoA
